# Supplementary material for: Current Perspectives on the Beneficial Effects of Soybean Isoflavones and Their Metabolites for Humans
Source: MDPI journal article supplement (doi:10.3390/antiox10071064), 2021-06-30
Supplement: s1 [file s1]

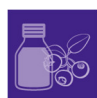

# Supplementary Materials: Current Perspectives on the Beneficial Effects of Soybean Isoflavones and Their Metabolites for Humans

Il-Sup Kim

Advanced Bio-Resource Research Center, Kyungpook National University, Daegu 41566, Korea;  
92kis@hanmail.net

**Table S1.** Experimental design strategy.

| Model                                                          | Isoflavone type                              | Approach        | Assay    | Ref |
|----------------------------------------------------------------|----------------------------------------------|-----------------|----------|-----|
| Neuroprotective effect and improvement of cognitive impairment |                                              |                 |          |     |
| Institute Cancer Research (ICR) mice                           | Isoflavones                                  | <i>In vivo</i>  | Observed | 55  |
| Virgin female Wistar rats                                      | Genistein                                    | <i>In vivo</i>  | Observed | 58  |
| Pregnant Sprague–Dawley (SD) rats                              | Genistein                                    | <i>In vivo</i>  | Observed | 61  |
| Antidepressant effects                                         |                                              |                 |          |     |
| Male ICR mice                                                  | Genistein                                    | <i>In vivo</i>  | Observed | 66  |
| Depressive pregnant women                                      | Isoflavones                                  | <i>In vivo</i>  | Clinical | 67  |
| Anti-obesity effects and protection against metabolic diseases |                                              |                 |          |     |
| Male SD rats                                                   | Soybean-fermented paste including isoflavone | <i>In vivo</i>  | Observed | 75  |
| Male SD rats                                                   | Isoflavones                                  | <i>In vivo</i>  | Observed | 77  |
| Female ovariectomized (OVX) Wistar rats                        | Isoflavones                                  | <i>In vivo</i>  | Observed | 79  |
| Effects on improving metabolic syndrome                        |                                              |                 |          |     |
| Female patients with irritable bowel syndrome (IBS)            | Isoflavone supplement                        | <i>In vivo</i>  | Observed | 91  |
| Female wild-type C57BL/6 mice                                  | Genistein                                    | <i>In vivo</i>  | Observed | 92  |
| Male SD rats                                                   | Normal chow diet containing isoflavone       | <i>In vivo</i>  | Observed | 93  |
| Regulation of blood pressure                                   |                                              |                 |          |     |
| Healthy 30–42-year-old premenopausal women                     | Novasoy™                                     | <i>In vivo</i>  | Clinical | 98  |
| African American and Caucasian men and women                   | Isoflavones                                  | <i>In vivo</i>  | Clinical | 100 |
| Improvement of cardiac and lung function                       |                                              |                 |          |     |
| Healthy male Kunming mice                                      | Genistein                                    | <i>In vivo</i>  | Observed | 106 |
| Rat aortic smooth muscle A10 cells                             | Genistein                                    | <i>In vitro</i> | Observed | 107 |
| Post-menopausal women                                          | Isoflavone                                   | <i>In vivo</i>  | Clinical | 110 |
| Adult male SD rats                                             | Daidzein                                     | <i>In vivo</i>  | Observed | 139 |
| Protection against liver damage                                |                                              |                 |          |     |
| SD rats                                                        | Isoflavones                                  | <i>In vivo</i>  | Observed | 114 |
| Male SD rats                                                   | Isoflavone                                   | <i>In vivo</i>  | Observed | 116 |
| Male C57BLKS/J- <i>db/db</i> mice                              | Genistein                                    | <i>In vivo</i>  | Observed | 119 |
| Improvement of renal dysfunction                               |                                              |                 |          |     |

|                                                                                |                         |                                   |          |     |
|--------------------------------------------------------------------------------|-------------------------|-----------------------------------|----------|-----|
| Patients with chronic kidney diseases (CDS)                                    | Isoflavones             | <i>In vivo</i>                    | Clinical | 120 |
| Ischemia/reperfusion (I/R) mice                                                | Genistein               | <i>In vivo</i>                    | Observed | 121 |
| I/R-induced mice                                                               | Genistein               | <i>In vivo</i>                    | Observed | 123 |
| Diabetic nephropathic rats                                                     | Isoflavone              | <i>In vivo</i>                    | Observed | 126 |
| Female ICR mice                                                                | Genistein               | <i>In vivo</i>                    | Observed | 127 |
| C57BL/6 mice; human kidney tubular HK2 and human embryonic kidney HEK293 cells | Genistein               | <i>In vivo</i><br><i>In vitro</i> | Observed | 129 |
| Anti-inflammatory effects                                                      |                         |                                   |          |     |
| Female BALB/c mice                                                             | Isoflavones             | <i>In vivo</i>                    | Observed | 137 |
| BALB/c mice                                                                    | Isoflavones             | <i>In vivo</i>                    | Observed | 138 |
| Adult male SD rats                                                             | Daidzein                | <i>In vivo</i>                    | Observed | 139 |
| Healthy adult male Albino mice                                                 | Daidzein                | <i>In vivo</i>                    | Observed | 141 |
| Human umbilical vein endothelial cell ECV-304                                  | Genistein               | <i>In vitro</i>                   | Observed | 143 |
| Female ICR mice                                                                | Isoflavone              | <i>In vitro</i>                   | Observed | 146 |
| Anticancer effect                                                              |                         |                                   |          |     |
| Healthy women and postmenopausal women                                         | Isoflavone              | <i>In vivo</i>                    | Clinical | 149 |
| Mouse prostate cancer RM-1 cells; RM-1 tumor-bearing C57BL/6 mice              | Genistein               | <i>In vivo</i><br><i>In vitro</i> | Observed | 150 |
| Patients diagnosed with benign prostate hyperplasia                            | Isoflavone              | <i>In vivo</i>                    | Clinical | 152 |
| Breast cancer MCF-7 cells                                                      | Genistein and quercetin | <i>In vitro</i>                   | Observed | 153 |
| Female SD rats                                                                 | Genistein and Tamoxifen | <i>In vivo</i>                    | Observed | 154 |
| Women with breast cancer                                                       | Isoflavone              | <i>In vivo</i>                    | Clinical | 155 |
| Gastric cancer AGS and MKN45 cells                                             | Genistein               | <i>In vitro</i>                   | Observed | 156 |
| Human breast cancer MDA-MB-231 cells                                           | Daidzein                | <i>In vitro</i>                   | Observed | 157 |
| Hepatocellular carcinoma (HCC) cells (Huh7, SK-HEP-1, and SNU-449)             | Genistein               | <i>In vitro</i>                   | Observed | 159 |
| Human lung cancer A549 cells                                                   | Genistein               | <i>In vitro</i>                   | Observed | 160 |
| Small-cell lung cancer H446 cells                                              | Genistein               | <i>In vitro</i>                   | Observed | 161 |
| Human adeno cervical carcinoma HeLa cells                                      | Pinostrobin             | <i>In vitro</i>                   | Observed | 162 |
| TC-1 tumor cells derived from lung epithelial cells of C57BL/6 mice            | Genistein               | <i>In vivo</i><br><i>In vitro</i> | Observed | 166 |
| Individuals                                                                    | Isoflavone              | <i>In vivo</i>                    | Clinical | 169 |
| Colorectal cancer patients                                                     | Isoflavones             | <i>In vivo</i>                    | Clinical | 170 |
| Chinese women diagnosed with ovarian cancer                                    | Isoflavones             | <i>In vivo</i>                    | Clinical | 171 |
| Human ovarian cancer BG-1 cells                                                | Genistein               | <i>In vitro</i>                   | Observed | 172 |

|                                                                                                              |                                             |                                   |          |     |
|--------------------------------------------------------------------------------------------------------------|---------------------------------------------|-----------------------------------|----------|-----|
| Patients diagnosed with prostate cancer                                                                      | Synthetic genistein                         | <i>In vivo</i>                    | Clinical | 173 |
|                                                                                                              |                                             |                                   |          | 175 |
| Human prostate cancer (PCa) cells                                                                            | Genistein                                   | <i>In vitro</i>                   | Observed | 174 |
| Human prostate cancer cells (PC3, DU145, and LnCaP); male BALB/c nu/nu nude mice                             | S-equol                                     | <i>In vivo</i><br><i>In vitro</i> | Observed | 177 |
| Men diagnosed with prostate cancer                                                                           | Isoflavones                                 | <i>In vivo</i>                    | Clinical | 178 |
| Patients diagnosed with prostate cancer                                                                      | Genistein                                   | <i>In vivo</i>                    | Clinical | 179 |
| PCa (LNCap and C4-2B) cells                                                                                  | Daidzein and genistein                      | <i>In vivo</i>                    | Observed | 180 |
| Renal cancer cells (786-O and ACHN)                                                                          | Genistein                                   | <i>In vitro</i>                   | Observed | 182 |
| Rats                                                                                                         | Genistein                                   | <i>In vivo</i>                    | Observed | 187 |
| Human mammary epithelial tumor MCF-7 cells                                                                   | Genistein                                   | <i>In vitro</i>                   | Observed | 188 |
| Female athymic nude mice                                                                                     | Soy flour containing isoflavones            | <i>In vivo</i>                    | Observed | 189 |
| Female athymic nude mice                                                                                     | Genistein                                   | <i>In vivo</i>                    | Observed | 190 |
| Breast cancer MCF-7 cells                                                                                    | Genistein and daidzein                      | <i>In vitro</i>                   | Observed | 191 |
| Female Wistar rats                                                                                           | Soy formulas                                | <i>In vivo</i>                    | Observed | 193 |
| Female aged 75 years                                                                                         | Super concentrated soy isoflavone           | <i>In vivo</i>                    | Clinical | 194 |
| Eight-year-old male diagnosed with prepubertal gynecomastia                                                  | Dietary soybean and soy-derived consumption | <i>In vivo</i>                    | Clinical | 195 |
| Sixty-year-old man diagnosed with gynecomastia                                                               | Dietary soy-product                         | <i>In vivo</i>                    | Clinical | 196 |
| Promotion of osteogenesis and the prevention of osteoporosis                                                 |                                             |                                   |          |     |
| OVX/high-fat diet (HFD) rat                                                                                  | Soy isoflavones plus hop prenylflavanones   | <i>In vitro</i>                   | Observed | 205 |
| Primary osteoblasts                                                                                          | Soy isoflavone mixture of GS, DZ and GT     | <i>In vitro</i>                   | Observed | 206 |
| Female SD rats                                                                                               | Isoflavone                                  | <i>In vivo</i>                    | Observed | 208 |
| Hsd:ICR (CD-1®) mice                                                                                         | Isoflavones                                 | <i>In vivo</i>                    | Observed | 210 |
| Female ICR mice                                                                                              | Isoflavone-enriched whole soy milk powder   | <i>In vivo</i>                    | Observed | 211 |
| Anti-diabetes effects                                                                                        |                                             |                                   |          |     |
| Non-Asian postmenopausal women                                                                               | Isoflavone                                  | <i>In vivo</i>                    | Clinical | 219 |
| Women diagnosed with polycystic ovary syndrome                                                               | Isoflavones                                 | <i>In vivo</i>                    | Clinical | 220 |
| Female non-obese diabetic mice                                                                               | Genistein                                   | <i>In vivo</i>                    | Observed | 221 |
| General men                                                                                                  | Isoflavones                                 | <i>In vivo</i>                    | Clinical | 222 |
| Rat skeletal muscle-derived cells; male C57BL/6J- <i>ob/ob</i> ( <i>ob/ob</i> ) and C57BL/6J <i>Jcl</i> mice | Equol                                       | <i>In vivo</i><br><i>In vitro</i> | Observed | 223 |
| Men                                                                                                          | Soy protein containing isoflavone           | <i>In vivo</i>                    | Clinical | 225 |

|                                                                                                                        |                                         |                                   |          |     |
|------------------------------------------------------------------------------------------------------------------------|-----------------------------------------|-----------------------------------|----------|-----|
| Men and women diagnosed with type 2 diabetes (T2D)                                                                     | Isoflavones                             | <i>In vivo</i>                    | Clinic   | 227 |
| Goto-Kakizaki (GK) T2D rats                                                                                            | Soy isoflavones                         | <i>In vivo</i>                    | Observed | 228 |
| Rat pancreatic $\beta$ -cells (INS-1); human HuH-7 hepatoma and Hepa-1c1c7 mouse hepatoma; five-week-old male ICR mice | S-equol                                 | <i>In vivo</i><br><i>In vitro</i> | Observed | 230 |
| Skin improvement                                                                                                       |                                         |                                   |          |     |
| Human keratinocyte (HaCaT) cells; male C57BL/6 mice                                                                    | Genistein                               | <i>In vivo</i><br><i>In vitro</i> | Observed | 184 |
| Normal human dermal fibroblasts and HaCaT; albino and hairless male mice (SKH:HR-1)                                    | Daidzein and genistein                  | <i>In vivo</i><br><i>In vitro</i> | Observed | 235 |
| Human skin fibroblast cells                                                                                            | Genistein and daidzein                  | <i>In vitro</i>                   | Observed | 236 |
| Female ICR mice                                                                                                        | Genistein                               | <i>In vivo</i>                    | Observed | 238 |
| Healthy, non-smoking, and post-menopausal females                                                                      | Isoflavone                              | <i>In vivo</i>                    | Clinical | 243 |
| Female SD rats                                                                                                         | Genistein                               | <i>In vivo</i>                    | Observed | 244 |
| Normal human epidermal keratinocytes; male BALB/c mice                                                                 | Isoflavone extract                      | <i>In vivo</i><br><i>In vitro</i> | Observed | 245 |
| Porcine ear                                                                                                            | Genistein                               | <i>In vivo</i>                    | Observed | 246 |
| Human keratinocytes and fibroblasts                                                                                    | Genistein                               | <i>In vitro</i>                   | Observed | 247 |
| Female Wistar rats                                                                                                     | Isoflavone mixed daidzein and genistein | <i>In vivo</i>                    | Observed | 248 |
| HaCaT cells; male BALB/c mice                                                                                          | Genistein                               | <i>In vivo</i><br><i>In vitro</i> | Observed | 249 |
| Enhanced quality of life for postmenopausal women based on improved physical and emotional symptoms                    |                                         |                                   |          |     |
| Perimenopausal or postmenopausal women                                                                                 | Isoflavones                             | <i>In vivo</i>                    | Clinical | 165 |
| Perimenopausal and postmenopausal women                                                                                | Isoflavone                              | <i>In vivo</i>                    | Clinical | 257 |
| Menopausal women                                                                                                       | Isoflavone                              | <i>In vivo</i>                    | Clinical | 258 |
| Osteopenic postmenopausal women                                                                                        | Genistein                               | <i>In vivo</i>                    | Clinical | 260 |
| Female C57BL/6 mice                                                                                                    | Isoflavone                              | <i>In vivo</i>                    | Observed | 265 |
| Menopausal women                                                                                                       | Daidzein                                | <i>In vivo</i>                    | Clinical | 266 |
| Safety of isoflavones in reproductive development                                                                      |                                         |                                   |          |     |
| Infants and child                                                                                                      | Soy protein containing isoflavone       | <i>In vivo</i>                    | Clinical | 273 |
| Weanling male SD rats                                                                                                  | Soy protein containing isoflavones      | <i>In vivo</i>                    | Observed | 275 |
| Improvement of arteriosclerosis                                                                                        |                                         |                                   |          |     |
| Pregnant SD rats                                                                                                       | Genistein                               | <i>In vivo</i>                    | Observed | 279 |
| Healthy men                                                                                                            | Isoflavones                             | <i>In vivo</i>                    | Clinical | 286 |
| Antioxidant activity                                                                                                   |                                         |                                   |          |     |
| Cells                                                                                                                  | Genistein, daidzein, And equol          | <i>In vitro</i>                   | Observed | 287 |

|                                              |                        |                                   |          |     |
|----------------------------------------------|------------------------|-----------------------------------|----------|-----|
| Chicken macrophage HD11 cells                | Equol                  | <i>In vitro</i>                   | Observed | 288 |
| Hops and beer                                | Flavonoids             | <i>In vivo</i><br><i>In vitro</i> | Observed | 290 |
| Subterranean and red clover                  | Phenolic compounds     | <i>In vitro</i>                   | Observed | 291 |
| Red clover                                   | Isoflavones            | <i>In vitro</i>                   | Observed | 292 |
| Antiviral effects                            |                        |                                   |          |     |
| Chicken embryo fibroblast DF-1 cells         | Genistein              | <i>In vitro</i>                   | Observed | 299 |
| Human A549 pneumocytes and Vero kidney cells | Biochain A             | <i>In vitro</i>                   | Observed | 301 |
| Anti-allergic effects                        |                        |                                   |          |     |
| HaCaT cells; male C57BL/6 mice               | Genistein              | <i>In vitro</i><br><i>In vivo</i> | Observed | 184 |
| Japanese pregnant women                      | Daidzein and genistein | <i>In vivo</i>                    | Clinical | 302 |

\*GS, genistein; DZ, daidzein; GT, glycitein.

**Table S2.** Neuroprotection and antidepressant effects of isoflavone and its metabolites.

| Model                                                          | Isoflavone (Conc.)/Assay                                    | Mode of action                                                                                                                                                                                                                                      | Ref |
|----------------------------------------------------------------|-------------------------------------------------------------|-----------------------------------------------------------------------------------------------------------------------------------------------------------------------------------------------------------------------------------------------------|-----|
| Neuroprotective effect and improvement of cognitive impairment |                                                             |                                                                                                                                                                                                                                                     |     |
| Scopolamine (SCOP)-induced ICR mice aged 4 weeks               | Isoflavones (40 mg/kg)/OB                                   | Upregulating phosphorylation levels of extracellular signal-regulated kinase (ERK), cyclic adenosine monophosphate (cAMP) response element-binding protein (CREB) and brain-derived neurotrophic factor (BDNF) expression levels in the hippocampus | 55  |
| Virgin female Wistar rats                                      | Genistein [10 and 40 mg/kg body weight (BW)]/OB             | Promoting neuroprotection by activating protein kinase B (Akt) pathway during aging                                                                                                                                                                 | 58  |
| Pregnant SD rats                                               | Genistein (~80 mg/kg)/OB                                    | Improving neuroprotective effects by inhibiting isoflurane-induced neuronal apoptosis and activating cAMP/CREB-BDNF-tropomyosin receptor kinase B (TrkB)-phosphoinositol 3-kinase (PI3K)/Akt signaling                                              | 60  |
| Male ICR mice aged four weeks                                  | 6,7,4'-Trihydroxyisoflavone (6,7,4-THIF; 0.5, 1.5 mg/kg)/OB | Increasing neuroprotective effect against SCOP-induced cognitive dysfunction and enhancing learning and memory performance by activating the cholinergic system and the phosphorylated CREB (p-CREB)/BDNF signaling pathway                         | 61  |
| Antidepressant effects                                         |                                                             |                                                                                                                                                                                                                                                     |     |
| Male ICR mice                                                  | Genistein (~45 mg/kg)/OB                                    | Playing a pivotal role in genistein-mediated anti-depression through the 5-hydroxytryptamine (5-HT; serotonin) system coupled with serotonin 1A (5-HT <sub>1A</sub> ) receptors                                                                     | 66  |
| Depressive pregnant women aged 31–69 years                     | Isoflavones (GS and DZ; 15.2–36.3 mg/d)/CL                  | Exhibiting independent inverse relationships between intake of isoflavones and depressive symptoms during pregnancy                                                                                                                                 | 67  |

\*OB, observed; CL, clinical; GS, genistein; DZ, daidzein.

**Table S3.** Anti-obesity, effects on improving metabolic syndrome and regulation of blood pressure effects of isoflavone and its metabolites.

| Model                                     | Isoflavone (Conc.)/Assay                                                                                           | Mode of action                                                                                                                                                                                                                                                                                                                       | Ref |
|-------------------------------------------|--------------------------------------------------------------------------------------------------------------------|--------------------------------------------------------------------------------------------------------------------------------------------------------------------------------------------------------------------------------------------------------------------------------------------------------------------------------------|-----|
| Anti-obesity effects                      |                                                                                                                    |                                                                                                                                                                                                                                                                                                                                      |     |
| Male SD rats                              | Soybean-fermented Meju containing isoflavones (100 g/kg)/OB                                                        | Reducing body weight (BW) gain, epididymal fat weight, and triglyceride (TG) levels in the serum and liver by inhibiting the lipogenic enzymes fatty acid synthase (FAS), malic enzyme (ME), and lipoprotein lipase (LPL) in epididymal adipose tissues and inactivating glucose-6-phosphate dehydrogenase (G6PD) in the liver       | 75  |
| Male SD rats                              | Isoflavone mixture containing 50.98% DZ: 30.36% GT: 8.80% GC: 1.24% DA: 0.06% GE (50 mg, 150 mg, and 400 mg/kg)/OB | Improving lipid homeostasis by inhibiting mammalian target of rapamycin complex 1 (mTORC1) activity through the phosphorylation of AKT and ribosomal protein S6                                                                                                                                                                      | 77  |
| Female OVX Wistar rats                    | Isoflavones (431 mg/kg/d)/OB                                                                                       | Lowering BW, visceral fat mass, serum leptin levels, and skeletal muscle weight and reducing adipocyte area by downregulating hepatic sterol regulatory element-binding protein 1c (SREBP-1c), acetyl-CoA carboxylase (ACC), FAS, and peroxisome proliferator-activated receptor-gamma (PPAR $\gamma$ ) at the transcriptional level | 79  |
| Effects on improving metabolic syndrome   |                                                                                                                    |                                                                                                                                                                                                                                                                                                                                      |     |
| Female patients with IBS aged 18–75 years | Isoflavone supplement containing 10 mg DZ, 8.5 mg GS, and 0.5 mg GC (40 mg/d)/OB                                   | Improving inflammation and intestinal permeability of women with IBS by reducing plasma inflammatory biomarkers and fecal protease activity, but not antioxidant activity                                                                                                                                                            | 91  |
| Female C57BL/mice aged 8–12 weeks         | Genistein (5, 20, 40 and 100 mg/kg)/OB                                                                             | Preventing inflammatory bowel disease by alleviating symptoms of dextran sodium sulfate-induced colitis; increasing BW, and reducing inflammation score; shifting M1 to M2 phenotype; and reducing systemic cytokine levels                                                                                                          | 92  |
| Male SD rats weighted 180 $\pm$ 10 g      | Normal chow diet containing isoflavone (0.038%)/OB                                                                 | Increasing fecal pellet number, fecal water content, intestinal transit rate, serum concentrations of substance P, and vasoactive intestinal peptide; inducing changes in intestinal microbiota; upregulating genes associated with glycan biosynthesis and metabolism                                                               | 93  |
| Regulation of blood pressure              |                                                                                                                    |                                                                                                                                                                                                                                                                                                                                      |     |
| Healthy premenopausal                     | Novasoy™ (246 mg)                                                                                                  | Normalizing systolic blood pressure (SBP) by modulating the physiological effects of calcium; decreasing                                                                                                                                                                                                                             | 98  |

|                                                               |                                                                                                                    |                                                               |     |
|---------------------------------------------------------------|--------------------------------------------------------------------------------------------------------------------|---------------------------------------------------------------|-----|
| women aged 30–42 years                                        | containing 68.3 mg of aglycone equivalent of DZ (30 mg), GS (30 mg), and GT (8.3 mg); 1 tablet for 5 d per week/CL | diastolic blood pressure independent of calcium concentration |     |
| African American and Caucasian men and women aged 18–30 years | Isoflavones (0.74–2.50 and 2.51–222.7 mg/d)/CL                                                                     | Lowering systolic blood pressure in a dose-dependent manner   | 100 |

\*OB, observed; CL, clinical, DZ, daidzein, DA, daidzin; GS, genistein; GE, genistin; GC, glycitin; GT, glycitein.

**Table S4.** Improvement of cardiac function, Protection against liver damage, and Improvement of renal dysfunction of isoflavone and its metabolites.

| Model                                      | Isoflavone (Conc.)/Assay          | Mode of action                                                                                                                                                                                                                                        | Ref |
|--------------------------------------------|-----------------------------------|-------------------------------------------------------------------------------------------------------------------------------------------------------------------------------------------------------------------------------------------------------|-----|
| Improvement of cardiac function            |                                   |                                                                                                                                                                                                                                                       |     |
| Healthy male Kunming mice weighing 20–25 g | Genistein (100 mg/kg/d)/OB        | Suppressing tumor growth factor beta (TGFβ)-activated kinase 1 (TAK1) expression and producing anti-fibrotic effects by blocking the TAK1/mitogen-activated protein (MAP) kinase kinase 4 (MKK4)/c-Jun N-terminal kinase (JNK) signaling pathway      | 106 |
| Rat aortic smooth muscle A10 cells         | Genistein (5 mg/kg BW)/OB         | Decreasing leptin-stimulated reactive oxygen species (ROS) generation and phosphorylation of the p44/mitogen-activated protein kinase (MAPK) signal transduction pathway                                                                              | 107 |
| Post-menopausal women aged mean 55 years   | Isoflavone (66 mg/d)/CL           | Improving cardiovascular disease risk markers by reducing metabolic parameters and SBP and reducing the risk of myocardial infarction, cardiovascular disease, and death due to cardiovascular disease                                                | 110 |
| Protection against liver damage            |                                   |                                                                                                                                                                                                                                                       |     |
| SD rats                                    | Isoflavones (10 or 20 mg/kg)/OB   | Alleviating hepatic steatosis and delaying the progression of non-alcoholic fatty liver disease (NAFLD) by inhibiting lipogenesis and promoting fatty acid oxidation in the liver                                                                     | 114 |
| Male SD rats weighting approximately 205 g | Isoflavone (10 and 20 mg/kg/d)/OB | Reducing high fat diet (HFD)-induced lipid accumulation and serum alanine transaminase (ALT) and improving liver lobule structure; downregulating sterol SREBP-1c and FAS and upregulating PPARα                                                      | 116 |
| Male C57BLKS/J- <i>db/db</i> mice          | Genistein (0.5–0.6 g/kg/d)/OB     | Causing oxidative stress, endoplasmic reticulum stress, and adenosine monophosphate (AMP)-activated protein kinase (AMPK) inactivation; downregulating the expression of genes associated with hepatic inflammation, lipid peroxidation, and fibrosis | 119 |
| Improvement of renal dysfunction           |                                   |                                                                                                                                                                                                                                                       |     |

|                                                                             |                                                      |                                                                                                                                                                                                                                                                                              |     |
|-----------------------------------------------------------------------------|------------------------------------------------------|----------------------------------------------------------------------------------------------------------------------------------------------------------------------------------------------------------------------------------------------------------------------------------------------|-----|
| Patients with CKD                                                           | Isoflavones (35.5–61 mg/d)/CL                        | Reducing blood urea nitrogen, serum creatinine, serum phosphorus, C reactive protein (CRP), and proteinuria in patients in the predialysis stage                                                                                                                                             | 120 |
| I/R mice                                                                    | Genistein (~ 15 mg/kg)/OB                            | Reducing renal I/R-induced cell death by reducing p53 and p21 expression; stimulating renal cell proliferation by increased proliferating cell nuclear antigen (PCNA) expression; upregulating Sirtuin 1 (SIRT1) expression                                                                  | 121 |
| I/R-induced mice aged 7–9 weeks                                             | Genistein (~ 15 mg/kg)/OB                            | Reducing I/R-induced cell death; stimulating renal cell proliferation; upregulating SIRT1, p53, and p21 expression and downregulating PCNA expression                                                                                                                                        | 123 |
| Diabetic nephropathic (DN) rats                                             | Isoflavone/OB                                        | Reducing urinary protein quantity; alleviating renal interstitial pathological damage; downregulating the expression of Wnt4, $\beta$ -catenin, and TGF- $\beta$ 1 in the renal interstitium                                                                                                 | 126 |
| Female ICR mice aged 5.5 weeks                                              | Genistein (0.025 and 0.1%)/OB                        | Improving levels of fasting blood glucose (FBG); attenuating kidney oxidative stress by decreasing levels of malondialdehyde (MDA), blood urea nitrogen (BUN), and plasma creatinine; improving inflammatory and oxidative stress markers                                                    | 127 |
| C57BL/6 mice; human kidney tubular HK2 and human embryo kidney HEK293 cells | Genistein (10 mg/kg in mice; 15 $\mu$ M in cells)/OB | Exhibiting anti-renal fibrosis activities by recovering the epigenetic loss of Klotho through the inhibition of histone 3 deacetylation of Klotho promoter and normalization of promoter DNA hypermethylation by suppressing DNA methyltransferase DNA methyltransferase 1 and 3a (DNMT1/3a) | 129 |

\*OB, observed; CL, clinical.

**Table S5.** Anti-inflammatory effects of isoflavone and its metabolites.

| Model                                            | Isoflavone (Conc.)/Assay           | Mode of action                                                                                                                                                                                                                                                                                                                                                                                          | Ref |
|--------------------------------------------------|------------------------------------|---------------------------------------------------------------------------------------------------------------------------------------------------------------------------------------------------------------------------------------------------------------------------------------------------------------------------------------------------------------------------------------------------------|-----|
| Female BALB/c mice                               | Isoflavones (5 mg/d; 250 mg/kg)/OB | Reducing infiltration and activation of alveolar macrophages and neutrophils in bronchoalveolar and lung parenchyma compartments upon irradiation; protecting F4/CD11c interstitial macrophages as an immunoregulator; producing decreased nitric oxide synthase 2 (NOS2) and increased arginase-1 (Arg1)                                                                                               | 137 |
| BALB/c mice aged 5–6 weeks                       | Isoflavones (1 mg/d)/OB            | Preserving Arg-1 activation and nuclear factor kappaB (NF- $\kappa$ B) inactivation in granulocytic myeloid-derived suppressor cells under irradiation; controlling pro-inflammatory cytokine production                                                                                                                                                                                                | 138 |
| Adult male SD rats weighing 250–300 g            | Daidzein (2, 4 and 8 mg/kg)/OB     | Inhibiting toll-like receptor 4 (TLR4)-myeloid differentiation primary response 88 (MyD88)-NF- $\kappa$ B pathway                                                                                                                                                                                                                                                                                       | 139 |
| Healthy adult male Albino mice weighting 25–35 g | Daidzein (0.2 and 1.0 mg/kg BW)/OB | Decreasing bacterial population in peritoneal fluid, blood, and lung tissue; reducing tumor necrosis factor alpha (TNF $\alpha$ ) and nitrite levels in the plasma; inhibiting lung injury by inactivating vascular permeability and myeloperoxidase (MPO) activity; increasing the expression of inducible NOS (iNOS) and glucocorticoid receptor $\alpha/\beta$ (GCR $\alpha/\beta$ ) in septic lungs | 141 |



|                                                             |                                                        |                                                                                                                                                                                                                                                                                              |     |
|-------------------------------------------------------------|--------------------------------------------------------|----------------------------------------------------------------------------------------------------------------------------------------------------------------------------------------------------------------------------------------------------------------------------------------------|-----|
| Human umbilical vein endothelial ECV-304 cell               | Genistein (~ 100 µM)/OB                                | Maintaining cell population and preventing changes in cell morphology and ROS accumulation by downregulating NF-κB, transcription factor p65, interleukin 6 (IL-6), and intracellular adhesion molecule 1 (ICAM-1); alleviating apoptosis and proliferation dysfunction of endothelial cells | 143 |
| Female ICR mice weighing 22.66 ± 0.12 g and aged five weeks | Soy product (daily diet containing 0.5% isoflavone)/OB | Alleviating dextran sulfate sodium (DSS)-induced growth inhibition and colonic inflammatory response, oxidative stress, and colonic barrier abnormality by downregulating TLR4/Myd88 signaling                                                                                               | 146 |

\*OB, observed.

**Table S6.** Anticancer effects of isoflavone and its metabolites.

| Model                                                                        | Isoflavone (Conc.)/Assay                             | Mode of action                                                                                                                                                                                                                                                                                                                                                                                | Ref |
|------------------------------------------------------------------------------|------------------------------------------------------|-----------------------------------------------------------------------------------------------------------------------------------------------------------------------------------------------------------------------------------------------------------------------------------------------------------------------------------------------------------------------------------------------|-----|
| Women and postmenopausal women aged 25–74 years                              | Isoflavone (0–122, 123–496 and ≥497 µg/d)/CL         | Reducing breast cancer risk through isoflavone intake in women after menopause, particularly the tumor group with estrogen (ER) and progesterone receptor (PR)                                                                                                                                                                                                                                | 149 |
| Mouse prostate cancer cells RM-1 cells; RM-1 tumor-bearing C57BL/6 mice      | Genistein (~ 120 µM)/OB                              | Increasing ROS-induced oxidative damage by downregulating the intracellular expression of apurinic/apyrimidinic endonuclease 1 (APE1) and reducing oxidative DNA repair in prostate cancer cells                                                                                                                                                                                              | 150 |
| Participants diagnosed with benign prostate hyperplasia                      | Isoflavone (40 mg/d)/CL                              | Being safe and tolerant with isoflavone-mediated anticancer activity                                                                                                                                                                                                                                                                                                                          | 152 |
| Breast cancer MCF-7 cells                                                    | Genistein and quercetin (~ 100 µM/L)/OB              | Inhibiting cellular proliferation through the intrinsic and extrinsic apoptotic pathways in a dose- and time-dependent manner; upregulating Fas ligand (FasL), Fas-associated protein with death domain (FADD), cytochrome C, truncated Bid, caspase-9, and caspase-3 and downregulating PI3K and AKT protein; inducing increased estrogen receptor beta (ERβ) expression and decreased ERα   | 153 |
| Female SD rats with mammary tumors induced by 7,12-dimethylbenz(a)anthracene | Genistein (500 ppm/d) and Tamoxifen (337 ppm/d)/OB   | Downregulating the unfolded protein response (UPR), autophagy-related genes [glucose-regulated protein 78 (GRP78), inositol-requiring enzyme 1 alpha (IRE1α), activating transcription factor 4 (ATF4), and beclin-1 (BECN1)], and genes associated with immunosuppression [TGFβ and forkhead box P3 (Foxp3)]; upregulating cluster of differentiation 8a (CD8a) as a cytotoxic T-cell marker | 154 |
| Women diagnosed with breast cancer                                           | Isoflavone (GS, DZ and GT; ≥1.5 mg and <0.3 mg/d)/CL | Reducing all-cause mortality through higher dietary intake in patients with breast cancer                                                                                                                                                                                                                                                                                                     | 155 |

|                                                                                                          |                                                                                  |                                                                                                                                                                                                                                                                                                                        |     |
|----------------------------------------------------------------------------------------------------------|----------------------------------------------------------------------------------|------------------------------------------------------------------------------------------------------------------------------------------------------------------------------------------------------------------------------------------------------------------------------------------------------------------------|-----|
| Gastric cancer AGS and MKN45 cells                                                                       | Genistein (10 µg/mL)/OB                                                          | Reducing the expression of zinc finger protein Gli1 and CD44 acting multifunctional cell surface adhesion receptor at transcriptional and translational levels; inhibiting cell migration ability                                                                                                                      | 156 |
| Human breast cancer MDA-MB-231 (metastatic, estrogen-unresponsive) and MCF-7 (estrogen-responsive) cells | Daidzein (50 and 100 µM)/OB                                                      | Exhibiting reduced cell viability and decreased cell migration by inducing a conformational change in DNA, lipids, and protein components associated with antioxidant systems                                                                                                                                          | 157 |
| Hepatocellular carcinoma SNU-449 cells                                                                   | Genistein (0, 200, 400, 600 µM)/OB                                               | Inhibiting the proliferation of SNU-449 cells in a concentration-dependent manner; enhancing genistein-induced apoptosis by downregulating thioredoxin-1 (Trx1), increasing intracellular production of ROS, and activating apoptosis signal-regulating kinase 1 (ASK1), JNK, and p38 as signal transduction mediators | 159 |
| Human lung cancer A549 cells                                                                             | Genistein (0, 10, 20, 50, 100 and 200 µM)/OB                                     | Inhibiting cell growth by inducing cell apoptosis following caspase-3/9 activation in a dose-dependent manner; activating microRNA-27a (miR-27a)-mediated MET signaling                                                                                                                                                | 160 |
| Small-cell lung cancer H446 cells                                                                        | Genistein/OB                                                                     | Reducing the proliferation and migration ability of H446 cell through apoptosis and G2/M cell cycle arrest; downregulating forkhead box protein M1 (FoxM1) and its target genes (i.e., Cdc25B, cyclin B1, and survivin) associated with cell cycle and apoptosis                                                       | 161 |
| Human adenocervical carcinoma HeLa cells                                                                 | Pinostrobin (10, 30, 50, 100 and 200 µM)/OB                                      | Inducing apoptosis through caspase dependent pathways by increasing ROS accumulation and ROS-mediated mitochondrial damage; upregulating the expression of proteins associated with extrinsic and intrinsic signaling pathways                                                                                         | 162 |
| Tumor TC-1 cells; C57BL/6 mice aged 6–8-weeks                                                            | Genistein (20 mg/kg)/OB                                                          | Increasing lymphocyte proliferation, interferon gamma (IFN-γ) expression, and lactate dehydrogenase (LDH) release                                                                                                                                                                                                      | 166 |
| Individuals aged 35 years or older                                                                       | Isoflavone (23.8~77.4 mg/d)/CL                                                   | Having a protective effect against stomach cancer of soy isoflavone                                                                                                                                                                                                                                                    | 169 |
| Patients diagnosed with colorectal cancer                                                                | Isoflavones (≥20.89 mg/day)/CL                                                   | Reducing the overall risk for colorectal cancer, including distal colon and rectal cancer                                                                                                                                                                                                                              | 170 |
| Chinese women diagnosed with ovarian cancer                                                              | Isoflavones (30.3 mg/d; mixture of DZ (12.4 mg), GS (15.5 mg) and GT (2.4 mg)/CL | Reducing ovarian cancer risk in a dose-dependent manner                                                                                                                                                                                                                                                                | 171 |
| Human ovarian cancer BG-1 cells                                                                          | Genistein (100 µM)/OB                                                            | Inhibiting epithelial-mesenchymal transition and migration abilities of ovarian cells enhanced by estrogenic chemicals (17β-estradiol, bisphenol A, and                                                                                                                                                                | 172 |

|                                                                                                                |                                                                                                           |                                                                                                                                                                                                                                                                                                                                                                                                                                                                                        |            |
|----------------------------------------------------------------------------------------------------------------|-----------------------------------------------------------------------------------------------------------|----------------------------------------------------------------------------------------------------------------------------------------------------------------------------------------------------------------------------------------------------------------------------------------------------------------------------------------------------------------------------------------------------------------------------------------------------------------------------------------|------------|
|                                                                                                                |                                                                                                           | nonylphenol); downregulating estrogenic chemicals-mediated TGF- $\beta$ signaling                                                                                                                                                                                                                                                                                                                                                                                                      |            |
| Patients diagnosed with prostate cancer                                                                        | Synthetic genistein (30 mg/d)/CL                                                                          | Regulating the expression of androgen-related biomarker [kallikrein-related peptidase 4 (KLK4)] and cell cycle-related biomarker (p27 <sup>Kip1</sup> ) in tumor cells; regulating the expression of genes involved in developmental processes, stem cell markers, proliferation, and transcriptional regulation; inducing decreased MYC (acting proto-oncogene and bHLH transcription factor) activity and increased phosphatase and tensin homolog (PTEN) activity                   | 173<br>175 |
| Human prostate cancer (PCa) PC3 and DU145 cells                                                                | Genistein (25 $\mu$ M/L)/OB                                                                               | Regulating homeobox (HOX) transcript antisense RNA (HOTAIR) in PCa cells; decreasing proliferation, migration and invasion and inducing apoptosis and cell cycle arrest in HOTAIR-knockdown PCa cells; upregulating tumor suppressor miR-34a in both PC3 and DU145 PCa cells                                                                                                                                                                                                           | 174        |
| Human prostate cancer PC3, DU145 and LnCaP cells; male BALB/c nu/nu nude mice aged four weeks weighing 18–20g) | S-equol (0, 50, 100, 150 and 200 $\mu$ M)/OB                                                              | Inhibiting the growth of all three cell lines (PC3, DU145 and LnCaP); promoting cell cycle arrest in the G2/M phase in PC3 cells by downregulating cyclin B1 and cyclin-dependent kinase 1 (CDK1) and upregulating CDK inhibitors (p21 and p27), as well as activating apoptosis by upregulating FasL and the expression of proapoptotic Bim; activating the Akt/forkhead box O3 (FOXO3a) pathway associated with prostate cancer cell survival, cell cycle progression, and apoptosis | 177        |
| Men diagnose with prostate cancer                                                                              | Isoflavones (34 mg/50 g slice of soy bread)/CL                                                            | Reducing type 1 T helper (TH1) and myeloid-derived suppressor cell (MDSC)-associated cytokines but not TH2 and TH17 cytokines                                                                                                                                                                                                                                                                                                                                                          | 178        |
| Men diagnosed with prostate cancer aged $\geq$ 40 years                                                        | Genistein (513.0 and 728.6 ng/mL)/CL                                                                      | Contributing to the low risk of prostate cancer at a high concentration of plasma genistein in people with Chinese ethnicity                                                                                                                                                                                                                                                                                                                                                           | 179        |
| Bone metastatic LNCaP-derivative PCa C4-2B cells                                                               | Daidzein (25–200 $\mu$ M), genistein (25–200 $\mu$ M) or their combinations (25 or 50 $\mu$ M of each)/OB | Increasing the synergistic effect by inhibiting cell proliferation and activating apoptosis; increasing the apoptotic effects in concentration of 25 $\mu$ M daidzein/50 $\mu$ M genistein and 50 $\mu$ M daidzein/50 $\mu$ M genistein in C4-2B cells                                                                                                                                                                                                                                 | 180        |
| Renal cancer 786-O and ACHN cells                                                                              | Genistein (0, 30, 60 and 90 $\mu$ M)/OB                                                                   | Inhibiting the activity of renal cancer stem cells (CSCs) by repressing tumor sphere formation, decreasing renal CSCs markers, inhibiting proliferation, and inducing apoptosis; downregulating the oncogenic sonic hedgehog (Shh) pathway                                                                                                                                                                                                                                             | 182        |
| Human interventional or observational data (MEDLIN, Embase, the                                                | Safety and efficacy of soy- and red clover-derived isoflavones in for                                     | Evidence showing harm from intake of soy isoflavone regarding risk of breast cancer or recurrence based on long term observational data; protective effects against breast cancer and recurrence through the consumption a traditional Japanese diet (2–3 servings daily,                                                                                                                                                                                                              | 183        |

|                                                                                                                |                                                                                                                                                              |                                                                                                                                                                                                                                                                                                                                                                          |     |
|----------------------------------------------------------------------------------------------------------------|--------------------------------------------------------------------------------------------------------------------------------------------------------------|--------------------------------------------------------------------------------------------------------------------------------------------------------------------------------------------------------------------------------------------------------------------------------------------------------------------------------------------------------------------------|-----|
| Cochrane Library, and AMED)                                                                                    | breast cancer/OB                                                                                                                                             | comprising 25–50 mg isoflavones); providing a synergistic effect in women taking tamoxifen plus soy isoflavone without side effects; no breast cancer-promoting effects for red clover                                                                                                                                                                                   |     |
| Rats                                                                                                           | Identification of differentially regulated proteins from the mammary glands of rats exposed to bisphenol A (BPA) and genistein with estrogenic properties/OB | Upregulating annexin A2, vascular endothelial growth factor receptor 2 (VEGFR2), and phospho-Akt in BPA-exposed rats, but downregulating these proteins in genistein-treated rats; activating GRP-78 and heat shock protein 70 (HSP-70) in response to BPA, and leading to upregulated fetuin B and downregulated phosphoglycerate kinase (PGK) in response to genistein | 187 |
| Human mammary epithelial tumor MCF-7 cells and primary breast adipose fibroblasts (BAFs)                       | Genistein (~ 100 µM)/OB                                                                                                                                      | Improving the efficacy of breast cancer treatment with aromatase inhibitors by disabling the growth inhibitory action of the aromatase inhibitor fadrozole in primary BAFs and estrogen-dependent MCF-7 tumor cells                                                                                                                                                      | 188 |
| Female athymic nude mice                                                                                       | Soy flour (180 g) and mixture of isoflavones and genistein (750 µM/g; 750 ppm)/OB                                                                            | Maintaining tumor growth and size; upregulating pS2 (Alzheimer's disease gene for apoptosis), progesterone receptor, and cyclin D1 (a regulator of cell cycle progression) and downregulating B-cell lymphoma 2 (Bcl2) as an apoptosis regulator at the transcriptional level                                                                                            | 189 |
| Female athymic nude mice                                                                                       | Genistein (750 ppm) and genistin (1200 ppm)/OB                                                                                                               | Stimulating estrogen-dependent breast cancer cell growth in vivo in the presence of the glycoside genistin and aglycone genistein                                                                                                                                                                                                                                        | 190 |
| Breast cancer MCF-7 cells                                                                                      | Genistein and daidzein (1, 5 and 10 µM)/OB                                                                                                                   | Stimulating the proliferation of estrogen receptor ERα(+) breast cancer cells at low concentrations, but not ERβ(+) cells <i>in vitro</i> ; increasing the risk of breast cancer development and progression in women following consumption of high-dose isoflavone supplements when it binds to ERα(+)                                                                  | 191 |
| Evaluating literatures associated with the risk developing endometriosis and/or the occurrence of dysmenorrhea | Food product associated with isoflavone/OB                                                                                                                   | Lowering the risk of developing endometriosis by taking fruits and vegetables, fish oils, dairy products rich in calcium and vitamin D, and omega-3 fatty acids                                                                                                                                                                                                          | 192 |
| Female Wistar rats aged 4 weeks                                                                                | Soy formulas (~ 60%)/OB                                                                                                                                      | Exhibiting faster growth; increasing the intensity of pelvic pain as well as the volume of ectopic foci in rats fed >10% dietary soy; increasing tissue levels of MDA and glutathione (GSH; reduced form)                                                                                                                                                                | 193 |

|                                                                  |                                                                    |                                                                                                                                                  |     |
|------------------------------------------------------------------|--------------------------------------------------------------------|--------------------------------------------------------------------------------------------------------------------------------------------------|-----|
| Women diagnosed with malignant mullerian carcinoma aged 75 years | Super concentrated soy isoflavone (DZ/DA;GT/GC; GE/GS; 72 mg/d)/CL | Promoting ureteral mullerian carcinosarcoma arising in endometriosis foci after extensive phytoestrogen supplementation                          | 194 |
| Male diagnosed with prepubertal gynecomastia aged 8 years        | Dietary soy-bean and soy-derived intake/CL                         | Contributing to the abnormal development of breast tissue in adolescent and adult males from the excessive intake of dietary soy                 | 195 |
| Man diagnosed with gynecomastia aged 6 years                     | Dietary soy-product (soy milk) consumption/CL                      | Resolving breast tenderness and recovering normal estradiol concentration by discontinuing soy milk consumption after a daily intake of soy milk | 196 |

\*OB, observed; CL, clinical, DZ, daidzein, DA, daidzin; GE, genistin; GS, genistein; GC, glycitin; GT, glycitein.

**Table S7.** Anti-osteoporosis and anti-diabetes effects of isoflavone and its metabolites.

| Model                                                        | Isoflavone (Conc.)/Assay                                                                                        | Mode of action                                                                                                                                                                                                                                                                                                                                                                                                                                                                                       | Ref |
|--------------------------------------------------------------|-----------------------------------------------------------------------------------------------------------------|------------------------------------------------------------------------------------------------------------------------------------------------------------------------------------------------------------------------------------------------------------------------------------------------------------------------------------------------------------------------------------------------------------------------------------------------------------------------------------------------------|-----|
| Promotion of osteogenesis and the prevention of osteoporosis |                                                                                                                 |                                                                                                                                                                                                                                                                                                                                                                                                                                                                                                      |     |
| OVX/HFD rat                                                  | Soy isoflavones (300–350 mg/g) plus hop prenylflavanones (Soy-Hop; ~ 300 mg/kg)/OB                              | Suppressing food intake, BW gain, fat mass, and circulating levels of leptin, adiponectin, low-density lipoprotein (LDL)-cholesterol, total cholesterol, TG, glucose, and insulin by consuming high-dose Soy-Hop; attenuating the elevation of osteocalcin (OC), alkaline phosphatase (ALP), and collagen type 1 cross-linked C telopeptide (CTX) in the plasma; regulating the receptor activator for nuclear factor $\kappa$ B ligand (RANKL)/osteoprotegerin (OPG) gene expression ratio in femur | 205 |
| Primary osteoblasts                                          | Soy isoflavone (0.1, 0.2 and 0.3 M) comprising of GS, DZ and GT, accounting for 60, 20 and 13%, respectively/OB | Increasing RANKL and ALP, and OPG levels in osteoblast cells; promoting cell proliferation and differentiation by activating Wnt/ $\beta$ -catenin pathway                                                                                                                                                                                                                                                                                                                                           | 206 |
| Female SD rats aged 3 weeks weighing 35–40 g                 | Isoflavone (10 and 50 mg/kg BW)/OB                                                                              | Exhibiting increased ALP activity and decreased OC; enhancing bone volume, trabecular number, bone mineral density (BMD), and trabecular thickness; stimulating longitudinal bone growth in low-dose supplementation; improving bone quality (BMD and structural parameters) with high-dose supplementation                                                                                                                                                                                          | 207 |
| Female rats aged 6 months                                    | Isoflavone (80, 200 and 350 mg/kg/d)/OB                                                                         | Improving the bone quality by increasing histomorphometric parameters, the content of glycosaminoglycans and mature type I collagen fibers in a dose-dependent manner, exception for cortical and trabecular bone, in femurs of rats                                                                                                                                                                                                                                                                 | 208 |
| CD-1 mice                                                    | Isoflavones                                                                                                     | Improving BMD and trabecular inter-connectivity in long bones and lumbar spine                                                                                                                                                                                                                                                                                                                                                                                                                       | 210 |

|                                                                                                                                        |                                                                 |                                                                                                                                                                                                                                                                   |     |
|----------------------------------------------------------------------------------------------------------------------------------------|-----------------------------------------------------------------|-------------------------------------------------------------------------------------------------------------------------------------------------------------------------------------------------------------------------------------------------------------------|-----|
| (multifunctional research animal model)                                                                                                | (2 mg DZ/kg BW; 5 mg GS/kg BW; or 2 mg DZ + 5 mg GS/kg BW)/OB   |                                                                                                                                                                                                                                                                   |     |
| Female ICR mice                                                                                                                        | Isoflavone-enriched whole soy milk powder (2%, 10%, and 20%)/OB | Increasing the concentration of serum calcium, OC, procollagen 1 N-terminal propeptide (P1NP), and OPG; inhibiting ALP and tartrate-resistant acid phosphatase (TRAP) 5b activity; preventing BMD reduction in a dose-dependent manner; promoting bone formation  | 211 |
| Anti-diabetes effects                                                                                                                  |                                                                 |                                                                                                                                                                                                                                                                   |     |
| Non-Asian post-menopausal women from 1970 to October 2010                                                                              | Isoflavone ( $\approx 100$ mg/d)/CL                             | Reducing BW, blood glucose level, and fasting insulin levels in women after menopause                                                                                                                                                                             | 219 |
| Women with polycystic ovary syndrome aged 18–40 years                                                                                  | Isoflavones (50 mg/d)/CL                                        | Decreasing circulating serum levels through insulin resistance, free androgen index, serum TG, and MDA levels; increasing the quantitative insulin sensitivity check index and total GSH in the plasma                                                            | 220 |
| Female non-obese diabetic (NOD) mice                                                                                                   | Genistein (2, 6 and 20 mg/kg)/OB                                | Decrease in the incidence of diabetes (blood glucose $\geq 250$ mg/dL) and severe diabetes (blood glucose $\geq 400$ mg/dL) ranging from 55 to 79% in the presence of genistein; decrease in higher total incidence of diabetes in animals treated with genistein | 221 |
| Men aged 45–75 years                                                                                                                   | Isoflavones (66 mg/d)/CL                                        | Reducing type I collagen crosslinked beta C-telopeptide ( $\beta$ CTX), glycosylated hemoglobin (HbA1c), and homeostatic model assessment of insulin resistance (HOMA-IR)                                                                                         | 222 |
| Rat skeletal muscle-derived cell line of L6 myoblasts; male C57BL/6J- <i>ob/ob</i> ( <i>ob/ob</i> ) and C57BL/6J Jcl mice aged 5 weeks | Equol ( $\sim 1$ $\mu$ M)/OB                                    | Increasing glucose transporter 4 (GLUT4) translocation to the plasma membrane through AMPK activation; suppressing FBG levels and downregulating the genes encoding hepatic enzymes associated with glucose metabolism                                            | 223 |
| Men aged 45–75 years with an early morning total testosterone concentrations of less than 12 nM/L                                      | Soy protein (15 g/d) containing isoflavone (66 mg/d)/CL         | Reducing type I collagen crosslinked $\beta$ CTX, HbA1c, and HOMA-IR                                                                                                                                                                                              | 225 |
| Men and women aged 25–42 and 40–75 years diagnosed with type 2 diabetes (T2D) in US                                                    | Isoflavones (0.62–13.13 mg/week)/CL                             | Lowering T2D risk                                                                                                                                                                                                                                                 | 227 |

|                                                                                                                            |                                                                              |                                                                                                                                                                                                                                              |     |
|----------------------------------------------------------------------------------------------------------------------------|------------------------------------------------------------------------------|----------------------------------------------------------------------------------------------------------------------------------------------------------------------------------------------------------------------------------------------|-----|
| Male Goto-Kakizaki (GK) type 2 diabetic rats aged 20 weeks                                                                 | Soy isoflavones from hypocotyl (DZ:GT:GS=61.7%:21.5%:15.2%; 150 mg/kg BW)/OB | Reducing FBG, CRP, and lipid peroxide; decreasing glycosylated serum protein, TNF $\alpha$ , and IL-6; inhibiting intestinal $\alpha$ -glucosidase; decreasing glucose transport potency into brush border membrane vesicles or Caco-2 cells | 228 |
| Rat pancreatic $\beta$ -cells (INS-1), human hepatoma (HuH-7), and mouse hepatoma (Hepa-1c1c7); male ICR mice aged 5 weeks | S-equol (10 $\mu$ M in cells and 20 mg/kg/d in mice)/OB                      | Increasing population and mass of $\beta$ -cell; highlighting growth, insulin secretion, and cAMP-response element (CRE)-mediated transcription in INS-1 cells; promoting glucose-stimulated insulin secretion in mouse pancreatic islets    | 230 |

\*OB, observed; CL, clinical, DZ, daidzein, DA, daidzin; GE, genistin; GS, genistein; GT, glycitein.

**Table S8.** Skin improvement of isoflavone and its metabolites.

| Model                                                                                                                  | Isoflavone (Conc.)/Assay                    | Mode of action                                                                                                                                                                                                                                                                                             | Ref |
|------------------------------------------------------------------------------------------------------------------------|---------------------------------------------|------------------------------------------------------------------------------------------------------------------------------------------------------------------------------------------------------------------------------------------------------------------------------------------------------------|-----|
| Human keratinocyte (HaCaT) cells; male C57BL/mice aged 6–8 weeks                                                       | Genistein (10, 20 and 40 mg/kg)/OB          | Antipruritic and anti-inflammatory effects by inhibiting the production of pro-inflammatory cytokines and intracellular mitogen-activated protein kinase kinase 2 (MAP2K2)/extracellular-signal-regulated kinase (ERK) signaling in HaCaT cells and mice                                                   | 184 |
| Normal human dermal fibroblasts and keratinocytes (HaCaT cells); albino and hairless male mice (SKH:HR-1) aged 7 weeks | Daidzein and genistein (each 10 $\mu$ M)/OB | Inhibiting IL-6 production and MAPK signaling in keratinocytes and fibroblasts in the presence of genistein; reducing macrophage infiltration to the dermis and decreasing the expression of iNOS and cyclooxygenase 2 (COX-2) in mice                                                                     | 235 |
| Human skin fibroblasts (BJ-5ta cells)                                                                                  | Genistein and daidzein (2–60 $\mu$ M)/OB    | Preventing ultraviolet B (UVB; 60 mJ/cm <sup>2</sup> )-induced DNA damage with both the isoflavone glucosides at a specific concentration and combination with an aglycone                                                                                                                                 | 236 |
| Female ICR mice aged 4 weeks                                                                                           | Genistein (0.25 and 1 g/kg)/OB              | Accelerating the rate of wound closure; activating the expression of copper/zinc superoxide dismutase (Cu/Zn-SOD), manganese superoxide dismutase (Mn-SOD), catalase, and GSH peroxidase in wound skin tissue; modulating NF- $\kappa$ B and TNF- $\alpha$ expression; lowering hepatic lipid peroxidation | 238 |
| Healthy, non-smoking, and post-menopausal females                                                                      | Isoflavone (40 and 70 mg/d)/CL              | Reducing the depth of facial wrinkles by increasing the deposition of new collagen fibres in the dermis                                                                                                                                                                                                    | 243 |
| Female SD rats aged six months                                                                                         | Genistein (1 mg/kg/d)/OB                    | Increasing skin flap viability by enhancing SOD activity and Bcl-2 expression, and upregulating genes associated with angiogenesis/inflammation promotion                                                                                                                                                  | 244 |

|                                                                                 |                                                                     |                                                                                                                                                                                                                                                                                                                                                                                                                                                                                                 |     |
|---------------------------------------------------------------------------------|---------------------------------------------------------------------|-------------------------------------------------------------------------------------------------------------------------------------------------------------------------------------------------------------------------------------------------------------------------------------------------------------------------------------------------------------------------------------------------------------------------------------------------------------------------------------------------|-----|
|                                                                                 |                                                                     | [connective tissue growth factor (CTGF), C-X-C motif chemokine 5 (CXCL5), IL-6, integrin beta 3 (ITGB3), matrix metalloproteinase-14 (MMP-14), and vascular endothelial growth factor A (VEGF-A)] and angiogenesis inhibition [endostatin (COL18A1), tissue inhibitor of metalloproteinase 2 and 3 (TIMP-2/3)]                                                                                                                                                                                  |     |
| Human epidermal keratinocytes (NHEKs); male BALB/c mice aged 8–11 weeks; normal | Isoflavone extract (10 mg/mL in mice; 1, 3 and 10 µg/mL in cell)/OB | Reducing trans-epidermal water loss (TEWL), erythema, blood flow speed, and ear thickness; increasing surface skin hydration; attenuating epidermal hyperplasia and inflammatory cell infiltration <i>in vivo</i> in mice; downregulating IL-22, IL-17A, and TNF- $\alpha$ -induced MAPK, NF- $\kappa$ B, and Janus kinase (JAK)-signal transducer and activator of transcription (STAT) activation in normal human epidermal keratinocytes <i>in vitro</i>                                     | 245 |
| Porcine ear                                                                     | Genistein (0.03%)/OB                                                | Protecting the skin against oxidative damage caused by UVA/ UVB light through their high antioxidant activity                                                                                                                                                                                                                                                                                                                                                                                   | 246 |
| Human keratinocytes and fibroblasts                                             | Genistein (~ 100 µM)/OB                                             | Improving cell viability, mitochondrial membrane potential, GSH levels, and proliferation rate by suppressing nitric oxide (NO) and ROS release under peroxidation conditions; activating PI3K-Akt and p38-MAPK signaling pathways, as well as NOS                                                                                                                                                                                                                                              | 247 |
| Female Wistar rats aged 3 months                                                | Isoflavone mixed DZ and GS (2 and 20 mg/kg BW/d)/OB                 | Improving the thickness of skin epidermis and collagen fibers in the dermis, as well as the amount of fibers; decreasing catalase activity in skin homogenates; inhibiting lipid peroxidation in a dose-dependent manner                                                                                                                                                                                                                                                                        | 248 |
| HaCaT cells; male BALB/c mice aged 7-8 weeks;                                   | Genistein (50 and 100 µM in mice; 3.12-200 µM in cells)/OB          | Inhibiting the proliferation of human keratinocyte HaCaT cells and inhibiting the expression of inflammatory factors in a dose-dependent manner; downregulating TNF $\alpha$ , IL-6, IL-23, and VEGFA expression; inhibiting phosphorylated STAT3 (pSTAT3) expression in the dorsal skin of imiquimod (IMQ) mice and in TNF- $\alpha$ -induced HaCaT cells; inhibiting the nuclear translocation of NF- $\kappa$ B and the phosphorylation of I- $\kappa$ B $\alpha$ (pI- $\kappa$ B $\alpha$ ) | 249 |

\*OB, observed; CL, clinical; DZ, daidzein; GS, genistein.

**Table S9.** Enhanced quality of life for postmenopausal women and safety in reproductive development of isoflavone and its metabolites.

| Model                                                                                               | Isoflavone (Conc.)/Assay | Mode of action                                                                                                         | Ref |
|-----------------------------------------------------------------------------------------------------|--------------------------|------------------------------------------------------------------------------------------------------------------------|-----|
| Enhanced quality of life for postmenopausal women based on improved physical and emotional symptoms |                          |                                                                                                                        |     |
| Perimenopausal or postmenopausal women aged 45 or more                                              | Isoflavones (50 mg/d)/CL | Improving both somatic and urogenital symptoms of menopause as well as the quality of women around and after menopause | 165 |



|                                                       |                                                                                                                                                        |                                                                                                                                                                                                                                                         |     |
|-------------------------------------------------------|--------------------------------------------------------------------------------------------------------------------------------------------------------|---------------------------------------------------------------------------------------------------------------------------------------------------------------------------------------------------------------------------------------------------------|-----|
| Women around and after menopause                      | Isoflavone (100 mg/d)/CL                                                                                                                               | Improving the menopause rating scale [i.e., hot flashes (HFs) and urogenital subscale] score                                                                                                                                                            | 257 |
| Menopausal women aged 45–65 years                     | Isoflavone (60 mg/d)/CL                                                                                                                                | Improving the Kupperman index (particularly hot HFs); improvement of sleep quality and psychophysical wellness parameters                                                                                                                               | 258 |
| Osteopenic postmenopausal women aged 49–67 years      | Genistein (54 mg/d)/CL                                                                                                                                 | Improving quality of life (such as physical and mental health, depression, and social function) in women with osteopenia after menopause                                                                                                                | 260 |
| Female C57BL/6 mice aged 12 months weighing 200–240 g | Isoflavone (5, 10 and 20 mg/kg/d)/OB                                                                                                                   | Increasing vaginal blood flow in a dose-dependent manner; improving female sexual dysfunction (FSD) by modulating the levels of hormones in the serum and histologic changes of the vagina through the endothelial nitric oxide synthase (eNOS) pathway | 265 |
| Menopausal women aged mean 50.5–58.5 years            | Daidzein (63 mg/d)/CL                                                                                                                                  | Lowering the incidence and severity of HFs in menopausal women                                                                                                                                                                                          | 266 |
| Safety of isoflavones in reproductive development     |                                                                                                                                                        |                                                                                                                                                                                                                                                         |     |
| Infants and children                                  | Soy protein (infants from birth until the age of 3 years; children aged 7.8–10.5 years; 6 g of soy product/3 d)/CL                                     | Exhibiting no association between infantile soy-based formula consumption and growth and puberty parameters, including body mass index (BMI) and z scores                                                                                               | 273 |
| Weanling male SD rats                                 | Soy product containing total isoflavones (3.21 g/kg) including GS (1.87 g/kg), GS aglycone (1.08 g/kg), DZ (1.22 g/kg), and DZ aglycone (0.69 g/kg)/OB | Regulating genes associated with macromolecule modifications including ubiquitination and histone methylation                                                                                                                                           | 275 |

\*OB, observed; CL, clinical; DZ, daidzein; GS, genistein.

**Table S10.** Improvement of arteriosclerosis, antioxidant activity, and antiviral and anti-allergic effects of isoflavone and its metabolites.

| Model                           | Isoflavone (Conc.)/Assay | Mode of action                                                                                             | Ref |
|---------------------------------|--------------------------|------------------------------------------------------------------------------------------------------------|-----|
| Improvement of arteriosclerosis |                          |                                                                                                            |     |
| Pregnant SD rats                | Genistein                | Attenuating the deleterious effects of BSA-derived xenoestrogen on epithelial cell proliferation, androgen | 279 |

|                                                                                                                                                                  |                                                                                                       |                                                                                                                                                                                                                                                                                                                                                                                                                   |     |
|------------------------------------------------------------------------------------------------------------------------------------------------------------------|-------------------------------------------------------------------------------------------------------|-------------------------------------------------------------------------------------------------------------------------------------------------------------------------------------------------------------------------------------------------------------------------------------------------------------------------------------------------------------------------------------------------------------------|-----|
| Male healthy men with total cholesterol (TC) >5.17 mmol/L and <6.21 mmol/L intervention                                                                          | (~ 5.5 mg/kg/d)/OB<br>Isoflavones (50 mg /100 g BW)/CL                                                | receptor expression and prostatic architecture in male offspring<br>Improving total cholesterol, non-high-density lipoprotein C (NHDL-C) [LDL + intermediate-density lipoprotein (IDL) + very-low-density lipoprotein (VLDL)] cholesterol fractions) and electronegative LDL concentrations; maintaining HDL-C level                                                                                              | 286 |
| Antioxidant activity                                                                                                                                             |                                                                                                       |                                                                                                                                                                                                                                                                                                                                                                                                                   |     |
| <i>In vitro</i> assay                                                                                                                                            | Genistein, daidzein and S-equol/OB                                                                    | Characterizing antioxidant properties of genistein, daidzein, and the daidzein metabolite–S-equol by evaluating detoxification of superoxide anion, hydroxyl radical, 2,2–diphenyl–1-picrylhydrazyl radical (DPPH), and hydrogen peroxide (H <sub>2</sub> O <sub>2</sub> ) using chemiluminescence and spectrophotometry techniques                                                                               | 287 |
| Chicken macrophage HD11 cells                                                                                                                                    | Equol (~ 160 µM/L)/OB                                                                                 | Producing lower levels of MDA and higher levels of GSH; elevating enzymatic activity of total SOD and iNOS; upregulating the expression of SOD2 and GSH transferase (GST), TLR4, TNFα, and IL-1β at the transcriptional level                                                                                                                                                                                     | 288 |
| Antioxidant activity of hop and beer containing flavonoids                                                                                                       | Hops and beer/OB                                                                                      | Exhibiting a broad spectrum of biological activities, including estrogenic, anticancer, neuroprotective, anti-inflammatory, and antimicrobial properties in hops and beer containing 8-prenylnaringenin (8-PN), 6-prenylnaringenin (6-PN), 6,8-diprenylnaringenin (6,8-DPN) and 8-geranylnaringenin (8-GN)                                                                                                        | 290 |
| Extraction and purification of phenolic compounds                                                                                                                | Subterranean clover ( <i>Trifolium subterraneum</i> ) and red clover ( <i>Trifolium pratense</i> )/OB | Producing biologically active flavonoid compounds, including isoflavone; identifying clovamide, four flavonols, and 15 isoflavones presenting as glucosides or glucosyl malonates; comprising derivatives of isoflavones, such as genistein, biochanin A, and formononetin in subterranean clover extracts; exhibiting higher isoflavone concentration in subterranean clover compared with soybean or red clover | 291 |
| Determining the maximized content of isoflavones (particularly ERβ) from red clover sprouts cultivated under different conditions (light, time, and temperature) | Red clover /OB                                                                                        | Producing the highest isoflavone (especially formononetin) content from sprouts cultivated for 10 d under continuous white light at 25 °C (562 mg/100 g fresh mass)                                                                                                                                                                                                                                               | 292 |
| Antiviral effects                                                                                                                                                |                                                                                                       |                                                                                                                                                                                                                                                                                                                                                                                                                   |     |
| Chicken embryo fibroblast DF-1 cells                                                                                                                             | Genistein (0, 12.5, 25, 50 and 100 µM)/OB                                                             | Inhibiting viral gene expression and decreasing viral protein expression in cell supernatant and the cytoplasm without changing virus receptor expression and viral attachment; inhibiting virus transcriptions and release in host cells                                                                                                                                                                         | 299 |

|                                                                            |                                                      |                                                                                                                                                                                                                                                                                                                                                                                                                                                                                     |     |
|----------------------------------------------------------------------------|------------------------------------------------------|-------------------------------------------------------------------------------------------------------------------------------------------------------------------------------------------------------------------------------------------------------------------------------------------------------------------------------------------------------------------------------------------------------------------------------------------------------------------------------------|-----|
| Human lung carcinoma A549 cells and African green monkey kidney Vero cells | Biochain A (0, 10, 20 and 40 µM)/OB                  | Inhibiting influenza A nucleoprotein production and replication in A549 cells infected with the highly pathogenic avian influenza H5N1 virus; reducing H5N1 infectious titres and virus-induced caspase 3 cleavage, and the nuclear export of viral ribonucleoprotein (RNP) complexes; affecting cellular signaling pathways by inactivating AKT, ERK 1/2, and NF-κB; inhibiting the virus-induced production of IL-6, IL-8, interferon gamma-induced protein 10 (IP-10), and TNF-α | 301 |
| Anti-allergic effects                                                      |                                                      |                                                                                                                                                                                                                                                                                                                                                                                                                                                                                     |     |
| Human keratinocyte (HaCaT) cells; male C57BL/6 mice aged 6–8 weeks         | Genistein (10, 20 and 40 mg/kg)/OB                   | Inhibiting MAP2K2- and MAPK-related signaling pathway by downregulating the expression of inflammatory factor and chemokines by the phosphorylation of ERK and STAT3                                                                                                                                                                                                                                                                                                                | 184 |
| Pregnant women                                                             | Daidzein and genistein (9.0 and 15. mg/d of each)/CL | Inducing anti-allergic rhinitis                                                                                                                                                                                                                                                                                                                                                                                                                                                     | 302 |

\*OB, observed; CL, clinical.

#### Abbreviation:

ACC, acetyl-CoA carboxylase; Akt, protein kinase B; ALP, alkaline phosphatase; ALT, alanine transaminase; AMP, adenosine monophosphate; AMPK, AMP-activated protein kinase; APE1, apurinic/apyrimidinic endonuclease 1; Arg1, arginase-1; ASK1, apoptosis signal-regulating kinase 1; ATF4, activating transcription factor 4; BAFs, breast adipose fibroblasts; Bcl2, B-cell lymphoma 2; BDNF, brain-derived neurotrophic factor; BECN1, beclin-1; BMD, bone mineral density; BMI, body mass index; BUN, blood urea nitrogen; BPA, bisphenol A; BW, body weight; cAMP, cyclic adenosine monophosphate; CD8a, cluster of differentiation 8a; CDK1, and cyclin-dependent kinase 1; CKD, chronic kidney disease; CL, clinical; COL18A1, endostatin; COX-2, cyclooxygenase 2; CRE, cAMP-response element; CRP, C reactive protein; CSCs, cancer stem cells; CTGF, connective tissue growth factor; CTX, collagen type 1 cross-linked C telopeptide; βCTX, type I collagen crosslinked beta C-telopeptide; Cu/Zn SOD, copper/zinc superoxide dismutase; Conc., concentration; CREB, cAMP response element-binding protein; CXCL5, C-X-C motif chemokine 5; eNOS, endothelial nitric oxide synthase; ERK, extracellular-signal-regulated kinase; DA, daidzin; DN, diabetic nephropathic; DNMT1/3a, DNA methyltransferase DNA methyltransferase 1 and 3a; 6,8-DPN, 6,8-diprenylnaringenin; DPPH, 2,2-diphenyl-1-picrylhydrazyl radical; DSS, dextran sulfate sodium; DZ, daidzein; ER, estrogen; ERα, estrogen receptor alpha; ERβ, estrogen receptor beta; ERK, extracellular signal-regulated kinase; FADD, Fas-associated protein with death domain; FAS, fatty acid synthase; FasL, Fas ligand; FBG, fasting blood glucose; FoxM1, forkhead box protein M1; FOXO3a, forkhead box O3; Foxp3, forkhead box P3; FSD, female sexual dysfunction; GC, glycerin; GCRα/β, glucocorticoid receptor alpha and beta; GE, genistin; GK, Goto-Kakizaki; GLUT4, glucose transporter 4; 8-GN, 8-geranylnaringenin; G6PD, glucose-6-phosphate dehydrogenase; GRP78, glucose-regulated protein 78; GS, genistein; GSH, reduced glutathione; GST, GSH transferase; GT, glycine; HbA1c, glycosylated hemoglobin; HCC, hepatocellular carcinoma; HDL, high-density lipoprotein; HFD, high-fat diet; HF, hot flashes; H<sub>2</sub>O<sub>2</sub>, hydrogen peroxide; HOMA-IR, homeostatic model assessment of insulin resistance; HOTAIR, homeobox transcript antisense RNA; HSP-70, heat shock protein 70; 5-HT, 5-hydroxytryptamine (or serotonin); 5-HT1A, serotonin 1A; HOX, homeobox; ICR, institute cancer research; IBS, irritable bowel syndrome; ICAM-1, intracellular adhesion molecule 1; IDL, intermediate-density lipoprotein; IFN-γ, interferon gamma; IL, interleukin; IMQ, imiquimod; iNOS, inducible nitric oxide synthase; IP-10, interferon gamma-induced protein 10; IR, ischemia/reperfusion; IRE1α, inositol-requiring enzyme 1 alpha; ITGB3, integrin beta 3; JAK, Janus kinase; JNK, c-Jun N-terminal kinase; KLK4, kallikrein-related peptidase 4; LDH, lactate dehydrogenase; LDL, low-density lipoprotein; LPL, lipoprotein lipase; MAP, mitogen-activated protein; MAP2K2, mitogen-activated protein kinase kinase 2; MAPK, mitogen-activated protein kinase;

MDA, malondialdehyde; MDSC, myeloid-derived suppressor cell; ME, malic enzyme; miR-27a, microRNA-27a; MKK4, MAP kinase kinase 4; MMP-14, matrix metalloproteinase-14; Mn SOD, manganese superoxide dismutase; MPO, myeloperoxidase; mTORC1, mammalian target of rapamycin complex 1; MyD88, myeloid differentiation primary response 88; NAFLD, non-alcoholic fatty liver disease; NF- $\kappa$ B, nuclear factor kappaB; NHDLC, non-high-density lipoprotein C; NO, nitric oxide; NOD, non-obese diabetic; NOS, nitric oxide synthase; OB, observed; OC, osteocalcin; OPG, osteoprotegerin; OVX, ovariectomized; PCa, prostate cancer; 6-PN, 6-prenylarangenin; 8-PN, 8-prenylarangenin; P1NP, procollagen 1 N-terminal propeptide; PCNA, proliferating cell nuclear antigen; p-CREB, phosphorylated CREB; PGK, phosphoglycerate kinase; PI3K, phosphoinositol 3-kinase; pI- $\kappa$ B $\alpha$ , phosphorylation of I- $\kappa$ B $\alpha$ ; PPAR $\gamma$ , peroxisome proliferator-activated receptor-gamma; PR, progesterone receptor; pSTAT3, phosphorylated STAT3; PTEN, phosphatase and tensin homolog; RANKL, receptor activator for nuclear factor  $\kappa$ B ligand; Ref, references; ROS, reactive oxygen species; SBP, systolic blood pressure; SCOP, scopolamine; SD, Sprague–Dawley; Shh, sonic hedgehog; 6,7,4'-THIF, 6,7,4'-trihydroxyisoflavone; SIRT1, Sirtuin 1; SREBP-1c, sterol regulatory element-binding protein 1c; STAT, signal transducer and activator of transcription; TAK1, TGF $\beta$ -activated kinase 1; TC, total cholesterol; T2D, type 2 diabetes; TEWL, trans-epidermal water loss; TG, triglyceride; TGF $\beta$ , tumor growth factor beta; TH, type T helper; TIMP-2/3, tissue inhibitor of metalloproteinase 2 and 3; TLR4, toll-like receptor 4; TNF $\alpha$ , tumor necrosis factor alpha; TRAP, tartrate-resistant acid phosphatase; TrkB, tropomyosin receptor kinase B; Trx1, thioredoxin-1; UPR, unfolded protein response; UVA, ultraviolet A; UVB, ultraviolet B; VEGF-A, vascular endothelial growth factor A; VEGFR2, vascular endothelial growth factor receptor 2; VLDL, very-low-density lipoprotein.
